# Supplementary material for: Bioassay-Guided Skin-Beneficial Effects of Fractionated Sideritis raeseri subsp. raeseri Extract
Source: MDPI journal article supplement (doi:10.3390/plants11202677), 2022-10-11
Supplement: s1 [file s1]

Supplementary Material

**Table S1.** IC<sub>50</sub> values (µg/mL) of SR samples in DPPH, ABTS and β-carotene bleaching assays.

| Sample                   | IC <sub>50</sub> value (µg/mL) |            |            |
|--------------------------|--------------------------------|------------|------------|
|                          | β-carotene bleaching assay     | DPPH assay | ABTS assay |
| Hydroethanolic extract   | >1000                          | 551.63     | 739.83     |
| Petroleum ether fraction | 817.84                         | >1000      | >1000      |
| Ethyl acetate fraction   | 792.40                         | 363.63     | 398.79     |
| Butanol fraction         | >1000                          | 264.26     | 483.40     |
| Water fraction           | >1000                          | 561.76     | 998.46     |
| BHA                      | 50.56                          | 123.40     | 52.05      |
| BHT                      | 64.43                          | 165.41     | 85.78      |
| Ascorbic acid            | >1000                          | 41.83      | 86.27      |
